# Supplementary material for: Predicting CT-Based Coronary Artery Disease Using Vascular Biomarkers Derived from Fundus Photographs with a Graph Convolutional Neural Network
Source: MDPI journal article supplement (doi:10.3390/diagnostics12061390), 2022-06-04
Supplement: s1 [file s1]

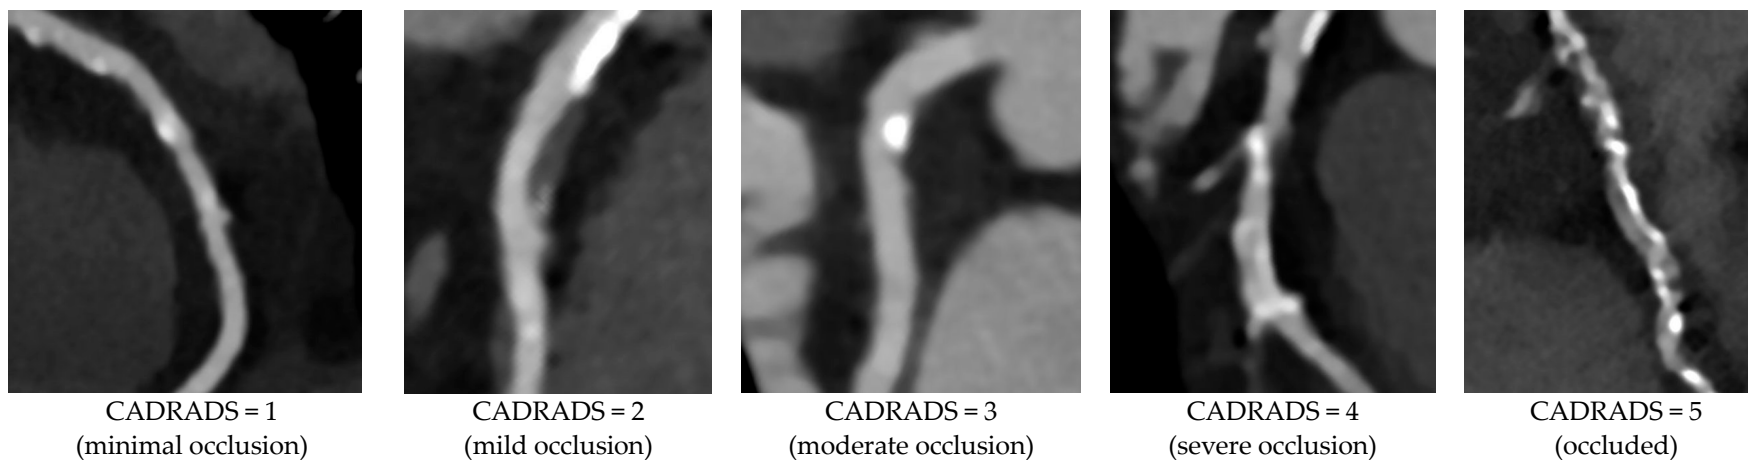

**Figure S1.** The CCTA examples for the subjects of diagnosed CADRADS=1 (minimal), 2 (mild occlusion), 3 (moderate), 4 (severe) and 5 (occluded), respectively.

**Table S1.** The Odd-ratio between CAD-RADS and 4 common eye diseases.

|                        | 0    | 1     |               |         | 2     |                |         | 3     |                |         | 4     |                |         | 5     |                |         |
|------------------------|------|-------|---------------|---------|-------|----------------|---------|-------|----------------|---------|-------|----------------|---------|-------|----------------|---------|
|                        |      | OR    | 95% CI        | P-value | OR    | 95% CI         | P-value | OR    | 95% CI         | P-value | OR    | 95% CI         | P-value | OR    | 95% CI         | P-value |
| Tessellated retina     |      |       |               |         |       |                |         |       |                |         |       |                |         |       |                |         |
| OR-Model 1*            | 1.00 | -     | (-, -)        | -       | 1.82  | (0.131,25.358) | 0.656   | 3.646 | (0.142,93.665) | 0.435   | -     | (-, -)         | -       | -     | (-, -)         | -       |
| OR-Model 2†            | 1.00 | -     | (-, -)        | -       | 2.127 | (0.14,32.272)  | 0.586   | 2.711 | (0.065,113.66) | 0.601   | -     | (-, -)         | -       | -     | (-, -)         | -       |
| DM-related retinopathy |      |       |               |         |       |                |         |       |                |         |       |                |         |       |                |         |
| OR-Model 1             | 1.00 | -     | (-, -)        | -       | 0.973 | (0.112,8.458)  | 0.98    | 1.248 | (0.095,16.406) | 0.866   | 2.256 | (0.155,32.818) | 0.551   | -     | (-, -)         | -       |
| OR-Model 2             | 1.00 | -     | (-, -)        | -       | 1.542 | (0.132,18.051) | 0.73    | 1.222 | (0.063,23.571) | 0.895   | 4.257 | (0.204,88.804) | 0.35    | -     | (-, -)         | -       |
| AMD                    |      |       |               |         |       |                |         |       |                |         |       |                |         |       |                |         |
| OR-Model 1             | 1.00 | 0.964 | (0.223,4.166) | 0.961   | 1.066 | (0.35,3.253)   | 0.91    | 1.04  | (0.266,4.065)  | 0.955   | 1.171 | (0.236,5.819)  | 0.847   | 1.058 | (0.102,10.959) | 0.962   |
| OR-Model 2             | 1.00 | 1.139 | (0.232,5.594) | 0.873   | 1.04  | (0.31,3.485)   | 0.949   | 2.573 | (0.529,12.529) | 0.242   | 1.929 | (0.312,11.933) | 0.48    | 1.196 | (0.101,14.152) | 0.887   |
| Pathologic myopia      |      |       |               |         |       |                |         |       |                |         |       |                |         |       |                |         |

|            |      |       |               |       |       |               |       |       |               |       |       |                |       |       |                |       |
|------------|------|-------|---------------|-------|-------|---------------|-------|-------|---------------|-------|-------|----------------|-------|-------|----------------|-------|
| OR-Model 1 | 1.00 | 0.973 | (0.163,5.809) | 0.976 | 0.977 | (0.25,3.812)  | 0.973 | 0.507 | (0.051,5.031) | 0.562 | 1.706 | (0.255,11.405) | 0.582 | 1.939 | (0.164,22.89)  | 0.599 |
| OR-Model 2 | 1.00 | 1.045 | (0.154,7.11)  | 0.964 | 0.86  | (0.196,3.778) | 0.841 | 0.804 | (0.065,9.905) | 0.865 | 3.456 | (0.387,30.84)  | 0.267 | 1.853 | (0.126,27.211) | 0.653 |

\* Model 1: adjusted for age, gender.

† Model 2: adjusted for the variables in model 1 plus cardiovascular disease risk factor including systolic blood pressure, heart rate, diabetes (self-reported), BMI and smoking status.

**Table S2.** The odd-ratio between the CAD-RADS and each retinal vascular biomarker. Bolded values indicated the significant association ( $p < 0.05$ ).

|                     |            | CAD-RADS Model 1 |                    |          |  | CAD-RADS Model 2 |              |          |
|---------------------|------------|------------------|--------------------|----------|--|------------------|--------------|----------|
|                     |            | CAD-RADS<=1      | CAD-RADS>=2        |          |  | CAT=0            | CAT=1        |          |
|                     |            |                  | OR (95%CI)         | P-values |  |                  | OR (95%CI)   | P-values |
| Mean arterial width | OR Model 1 | 1.00             | 0 (0, +∞)          | 0.49     |  | 1.00             | +∞ (0, +∞)   | 0.58     |
|                     | OR Model 2 | 1.00             | 0 (0, +∞)          | 0.10     |  | 1.00             | 0 (0, +∞)    | 0.89     |
| Std arterial width  | OR Model 1 | 1.00             | 0 (0, 0.68)        | <0.05    |  | 1.00             | 0 (0, +∞)    | 0.10     |
|                     | OR Model 2 | 1.00             | 0 (0, 1.974)       | 0.06     |  | 1.00             | 0 (0, +∞)    | 0.27     |
| Med arterial width  | OR Model 1 | 1.00             | 0.658 (0, +∞)      | 0.94     |  | 1.00             | 0.002(0, +∞) | 0.87     |
|                     | OR Model 2 | 1.00             | +∞ (0, +∞)         | 0.28     |  | 1.00             | +∞ (0, +∞)   | 0.97     |
| Min arterial width  | OR Model 1 | 1.00             | 0.338 (0, +∞)      | 0.83     |  | 1.00             | 0 (0, +∞)    | 0.29     |
|                     | OR Model 2 | 1.00             | 64.053 (0, +∞)     | 0.50     |  | 1.00             | 0 (0, +∞)    | 0.17     |
| Max arterial width  | OR Model 1 | 1.00             | +∞ (0, +∞)         | 0.43     |  | 1.00             | 0 (0, +∞)    | 0.46     |
|                     | OR Model 2 | 1.00             | +∞ (0, +∞)         | 0.48     |  | 1.00             | +∞ (0, +∞)   | 0.48     |
| Mean venous width   | OR Model 1 | 1.00             | 0.002 (0, +∞)      | 0.40     |  | 1.00             | 0 (0, 1.208) | 0.05     |
|                     | OR Model 2 | 1.00             | 0 (0, +∞)          | 0.22     |  | 1.00             | 0 (0, +∞)    | 0.35     |
| Std venous width    | OR Model 1 | 1.00             | 0.013 (0, 18.353)  | 0.24     |  | 1.00             | +∞ (0, +∞)   | 0.76     |
|                     | OR Model 2 | 1.00             | 0 (0, 1.653)       | 0.06     |  | 1.00             | +∞ (0, +∞)   | 0.38     |
| Med venous width    | OR Model 1 | 1.00             | 83.730 (0.002, +∞) | 0.41     |  | 1.00             | +∞ (0, +∞)   | 0.06     |
|                     | OR Model 2 | 1.00             | +∞ (0.013, +∞)     | 0.19     |  | 1.00             | +∞ (0, +∞)   | 0.23     |
| Min venous width    | OR Model 1 | 1.00             | +∞ (0.251, +∞)     | 0.12     |  | 1.00             | +∞ (0, +∞)   | 0.11     |
|                     | OR Model 2 | 1.00             | +∞ (0.241, +∞)     | 0.11     |  | 1.00             | +∞ (0, +∞)   | 0.23     |

|                     |            |      |                              |                 |  |      |                              |                 |
|---------------------|------------|------|------------------------------|-----------------|--|------|------------------------------|-----------------|
| Max venous width    | OR Model 1 | 1.00 | $+\infty (0.033, +\infty)$   | 0.21            |  | 1.00 | $+\infty (+\infty, +\infty)$ | <b>&lt;0.05</b> |
|                     | OR Model 2 | 1.00 | $+\infty (0.419, +\infty)$   | 0.07            |  | 1.00 | $+\infty (0, +\infty)$       | 0.67            |
| Mean arterial angle | OR Model 1 | 1.00 | $+\infty (0, +\infty)$       | 0.32            |  | 1.00 | 0 (0, $+\infty$ )            | 0.07            |
|                     | OR Model 2 | 1.00 | $+\infty (0, +\infty)$       | 0.13            |  | 1.00 | 0 (0, $+\infty$ )            | 0.80            |
| Std arterial angle  | OR Model 1 | 1.00 | $+\infty (+\infty, +\infty)$ | <b>&lt;0.05</b> |  | 1.00 | 0 (0, 81.993)                | 0.06            |
|                     | OR Model 2 | 1.00 | $+\infty (+\infty, +\infty)$ | <b>&lt;0.05</b> |  | 1.00 | 0 (0, $+\infty$ )            | 0.79            |
| Med arterial angle  | OR Model 1 | 1.00 | 0.002 (0, $+\infty$ )        | 0.47            |  | 1.00 | $+\infty (0, +\infty)$       | 0.08            |
|                     | OR Model 2 | 1.00 | 0 (0, $+\infty$ )            | 0.24            |  | 1.00 | 0 (0, $+\infty$ )            | 0.96            |
| Min arterial angle  | OR Model 1 | 1.00 | $+\infty (0.187, +\infty)$   | 0.08            |  | 1.00 | 0.011 (0, $+\infty$ )        | 0.77            |
|                     | OR Model 2 | 1.00 | $+\infty (0.018, +\infty)$   | 0.13            |  | 1.00 | $+\infty (0, +\infty)$       | 0.51            |
| Max arterial angle  | OR Model 1 | 1.00 | 0 (0, 0.025)                 | <b>&lt;0.05</b> |  | 1.00 | $+\infty (0, +\infty)$       | 0.12            |
|                     | OR Model 2 | 1.00 | 0 (0, 0.003)                 | <b>&lt;0.05</b> |  | 1.00 | $+\infty (0, +\infty)$       | 0.94            |
| Mean venous angle   | OR Model 1 | 1.00 | $+\infty (0, +\infty)$       | 0.22            |  | 1.00 | $+\infty (0, +\infty)$       | 0.15            |
|                     | OR Model 2 | 1.00 | $+\infty (0.009, +\infty)$   | 0.12            |  | 1.00 | $+\infty (0, +\infty)$       | 0.89            |
| Std venous angle    | OR Model 1 | 1.00 | 0 (0, 0.003)                 | <b>&lt;0.05</b> |  | 1.00 | 0.023(0, $+\infty$ )         | 0.82            |
|                     | OR Model 2 | 1.00 | 0 (0, 0.005)                 | <b>&lt;0.05</b> |  | 1.00 | 0 (0, $+\infty$ )            | 0.56            |
| Med venous angle    | OR Model 1 | 1.00 | 0.237 (0, $+\infty$ )        | 0.82            |  | 1.00 | 0 (0, $+\infty$ )            | 0.56            |
|                     | OR Model 2 | 1.00 | 0.020 (0, $+\infty$ )        | 0.59            |  | 1.00 | 0 (0, $+\infty$ )            | 0.98            |
| Min venous angle    | OR Model 1 | 1.00 | 0 (0, 0.077)                 | <b>&lt;0.05</b> |  | 1.00 | $+\infty (0.006, +\infty)$   | 0.08            |
|                     | OR Model 2 | 1.00 | 0 (0, 0.213)                 | <b>&lt;0.05</b> |  | 1.00 | 4.149 (0, $+\infty$ )        | 1.00            |
| Max venous angle    | OR Model 1 | 1.00 | $+\infty (0.119, +\infty)$   | 0.14            |  | 1.00 | $+\infty (0, +\infty)$       | 0.20            |
|                     | OR Model 2 | 1.00 | $+\infty (0.008, +\infty)$   | 0.33            |  | 1.00 | $+\infty (0, +\infty)$       | 0.57            |
| Mean $\tau_1$       | OR Model 1 | 1.00 | 0 (0, $+\infty$ )            | 0.75            |  | 1.00 | $+\infty (+\infty, +\infty)$ | <b>&lt;0.05</b> |
|                     | OR Model 2 | 1.00 | 0 (0, $+\infty$ )            | 0.91            |  | 1.00 | $+\infty (0, +\infty)$       | 0.85            |
| Std $\tau_1$        | OR Model 1 | 1.00 | 0 (0, 0)                     | <b>&lt;0.05</b> |  | 1.00 | 0 (0, 0)                     | <b>&lt;0.05</b> |
|                     | OR Model 2 | 1.00 | 0 (0, 0)                     | <b>&lt;0.05</b> |  | 1.00 | $+\infty (0, +\infty)$       | 0.90            |
| Med $\tau_1$        | OR Model 1 | 1.00 | $+\infty (0, +\infty)$       | 0.46            |  | 1.00 | 0 (0, $+\infty$ )            | 0.14            |

|               |            |      |                              |                 |  |      |                            |                 |
|---------------|------------|------|------------------------------|-----------------|--|------|----------------------------|-----------------|
|               | OR Model 2 | 1.00 | $+\infty (0, +\infty)$       | 0.24            |  | 1.00 | $+\infty (0, +\infty)$     | 0.90            |
| Min $\tau_1$  | OR Model 1 | 1.00 | $+\infty (1.611, +\infty)$   | <b>&lt;0.05</b> |  | 1.00 | $+\infty (2.093, +\infty)$ | <b>&lt;0.05</b> |
|               | OR Model 2 | 1.00 | $+\infty (0.611, +\infty)$   | 0.06            |  | 1.00 | $+\infty (0, +\infty)$     | 0.56            |
| Max $\tau_1$  | OR Model 1 | 1.00 | $+\infty (+\infty, +\infty)$ | <b>&lt;0.05</b> |  | 1.00 | $+\infty (0, +\infty)$     | 0.32            |
|               | OR Model 2 | 1.00 | $+\infty (+\infty, +\infty)$ | <b>&lt;0.05</b> |  | 1.00 | 0 (0, $+\infty$ )          | 0.70            |
| Mean $\tau_2$ | OR Model 1 | 1.00 | 0 (0, 0)                     | <b>&lt;0.05</b> |  | 1.00 | 0 (0, 0)                   | <b>&lt;0.05</b> |
|               | OR Model 2 | 1.00 | 0 (0, 0)                     | <b>&lt;0.05</b> |  | 1.00 | 0 (0, 0)                   | <b>&lt;0.05</b> |
| Std $\tau_2$  | OR Model 1 | 1.00 | 0 (0, 0)                     | <b>&lt;0.05</b> |  | 1.00 | 0 (0, 0)                   | <b>&lt;0.05</b> |
|               | OR Model 2 | 1.00 | 0 (0, 0)                     | <b>&lt;0.05</b> |  | 1.00 | 0 (0, 0)                   | <b>&lt;0.05</b> |
| Med $\tau_2$  | OR Model 1 | 1.00 | 0 (0, 0)                     | <b>&lt;0.05</b> |  | 1.00 | 0 (0, 0)                   | <b>&lt;0.05</b> |
|               | OR Model 2 | 1.00 | 0 (0, 0)                     | <b>&lt;0.05</b> |  | 1.00 | 0 (0, 0)                   | <b>&lt;0.05</b> |
| Min $\tau_2$  | OR Model 1 | 1.00 | 0 (0, 0)                     | <b>&lt;0.05</b> |  | 1.00 | 0 (0, 0)                   | <b>&lt;0.05</b> |
|               | OR Model 2 | 1.00 | 0 (0, 0)                     | <b>&lt;0.05</b> |  | 1.00 | 0 (0, 0)                   | <b>&lt;0.05</b> |
| Max $\tau_2$  | OR Model 1 | 1.00 | 0 (0, 0)                     | <b>&lt;0.05</b> |  | 1.00 | 0 (0, 0)                   | <b>&lt;0.05</b> |
|               | OR Model 2 | 1.00 | 0 (0, 0)                     | <b>&lt;0.05</b> |  | 1.00 | 0 (0, 0)                   | <b>&lt;0.05</b> |
| Mean $\tau_3$ | OR Model 1 | 1.00 | $+\infty (0, +\infty)$       | 0.25            |  | 1.00 | $+\infty (0, +\infty)$     | 0.12            |
|               | OR Model 2 | 1.00 | $+\infty (0, +\infty)$       | 0.10            |  | 1.00 | 0 (0, $+\infty$ )          | 0.95            |
| Std $\tau_3$  | OR Model 1 | 1.00 | 0 (0, 0)                     | <b>&lt;0.05</b> |  | 1.00 | 0 (0, $+\infty$ )          | 0.24            |
|               | OR Model 2 | 1.00 | 0 (0, 0)                     | <b>&lt;0.05</b> |  | 1.00 | 0 (0, $+\infty$ )          | 0.42            |
| Med $\tau_3$  | OR Model 1 | 1.00 | 0 (0, 0)                     | <b>&lt;0.05</b> |  | 1.00 | 0 (0, $+\infty$ )          | 0.11            |
|               | OR Model 2 | 1.00 | 0 (0, 0)                     | <b>&lt;0.05</b> |  | 1.00 | 0 (0, $+\infty$ )          | 0.06            |
| Min $\tau_3$  | OR Model 1 | 1.00 | 26.828 (0, $+\infty$ )       | 0.83            |  | 1.00 | 0 (0, $+\infty$ )          | 0.60            |
|               | OR Model 2 | 1.00 | $+\infty (0, +\infty)$       | 0.46            |  | 1.00 | 0 (0, $+\infty$ )          | 0.18            |
| Max $\tau_3$  | OR Model 1 | 1.00 | $+\infty (+\infty, +\infty)$ | <b>&lt;0.05</b> |  | 1.00 | $+\infty (0, +\infty)$     | 0.48            |
|               | OR Model 2 | 1.00 | $+\infty (+\infty, +\infty)$ | <b>&lt;0.05</b> |  | 1.00 | $+\infty (0, +\infty)$     | 0.50            |
| Mean $\tau_4$ | OR Model 1 | 1.00 | 0 (0, $+\infty$ )            | 0.50            |  | 1.00 | 0 (0, $+\infty$ )          | 0.22            |
|               | OR Model 2 | 1.00 | 0 (0, $+\infty$ )            | 0.19            |  | 1.00 | $+\infty (0, +\infty)$     | 0.69            |

|               |            |      |                              |                 |  |      |                              |                 |
|---------------|------------|------|------------------------------|-----------------|--|------|------------------------------|-----------------|
| Std $\tau_4$  | OR Model 1 | 1.00 | $+\infty (+\infty, +\infty)$ | <b>&lt;0.05</b> |  | 1.00 | $+\infty (0, +\infty)$       | 0.57            |
|               | OR Model 2 | 1.00 | $+\infty (+\infty, +\infty)$ | <b>&lt;0.05</b> |  | 1.00 | 0 (0, $+\infty$ )            | 0.69            |
| Med $\tau_4$  | OR Model 1 | 1.00 | $+\infty (0.264, +\infty)$   | 0.06            |  | 1.00 | 0 (0, $+\infty$ )            | 0.44            |
|               | OR Model 2 | 1.00 | $+\infty (0.481, +\infty)$   | 0.06            |  | 1.00 | $+\infty (0, +\infty)$       | 0.76            |
| Min $\tau_4$  | OR Model 1 | 1.00 | 0.0115 (0, $+\infty$ )       | 0.80            |  | 1.00 | $+\infty (0, +\infty)$       | 0.33            |
|               | OR Model 2 | 1.00 | 0 (0, $+\infty$ )            | 0.44            |  | 1.00 | $+\infty (0, +\infty)$       | 0.28            |
| Max $\tau_4$  | OR Model 1 | 1.00 | 0 (0, 0)                     | <b>&lt;0.05</b> |  | 1.00 | $+\infty (0, +\infty)$       | 0.87            |
|               | OR Model 2 | 1.00 | 0 (0, 0)                     | <b>&lt;0.05</b> |  | 1.00 | $+\infty (0, +\infty)$       | 0.61            |
| Mean $\tau_5$ | OR Model 1 | 1.00 | 0 (0, $+\infty$ )            | 0.56            |  | 1.00 | $+\infty (0, +\infty)$       | 0.10            |
|               | OR Model 2 | 1.00 | 0 (0, $+\infty$ )            | 0.30            |  | 1.00 | 0 (0, $+\infty$ )            | 0.64            |
| Std $\tau_5$  | OR Model 1 | 1.00 | $+\infty (0, +\infty)$       | 0.22            |  | 1.00 | $+\infty (0, +\infty)$       | 0.16            |
|               | OR Model 2 | 1.00 | $+\infty (0, +\infty)$       | 0.23            |  | 1.00 | $+\infty (0, +\infty)$       | 0.60            |
| Med $\tau_5$  | OR Model 1 | 1.00 | 0 (0, 38.383)                | 0.09            |  | 1.00 | 0 (0, $+\infty$ )            | 0.08            |
|               | OR Model 2 | 1.00 | 0 (0, 0.006)                 | <b>&lt;0.05</b> |  | 1.00 | 0 (0, $+\infty$ )            | 0.65            |
| Min $\tau_5$  | OR Model 1 | 1.00 | $+\infty (0, +\infty)$       | 0.45            |  | 1.00 | $+\infty (0, +\infty)$       | 0.36            |
|               | OR Model 2 | 1.00 | $+\infty (0, +\infty)$       | 0.77            |  | 1.00 | $+\infty (0, +\infty)$       | 0.49            |
| Max $\tau_5$  | OR Model 1 | 1.00 | 0.002 (0, $+\infty$ )        | 0.65            |  | 1.00 | 0 (0, $+\infty$ )            | 0.08            |
|               | OR Model 2 | 1.00 | 0.0118(0, $+\infty$ )        | 0.80            |  | 1.00 | 0 (0, $+\infty$ )            | 0.89            |
| Mean $\tau_6$ | OR Model 1 | 1.00 | 0 (0, $+\infty$ )            | 0.41            |  | 1.00 | 0 (0, $+\infty$ )            | 0.09            |
|               | OR Model 2 | 1.00 | 0 (0, $+\infty$ )            | 0.63            |  | 1.00 | $+\infty (0, +\infty)$       | 0.96            |
| Std $\tau_6$  | OR Model 1 | 1.00 | $+\infty (0, +\infty)$       | 0.45            |  | 1.00 | $+\infty (+\infty, +\infty)$ | <b>&lt;0.05</b> |
|               | OR Model 2 | 1.00 | $+\infty (0, +\infty)$       | 0.54            |  | 1.00 | $+\infty (0, +\infty)$       | 0.19            |
| Med $\tau_6$  | OR Model 1 | 1.00 | $+\infty (0, +\infty)$       | 0.62            |  | 1.00 | $+\infty (+\infty, +\infty)$ | <b>&lt;0.05</b> |
|               | OR Model 2 | 1.00 | $+\infty (0, +\infty)$       | 0.46            |  | 1.00 | $+\infty (0, +\infty)$       | 0.16            |
| Min $\tau_6$  | OR Model 1 | 1.00 | $+\infty (0, +\infty)$       | 0.31            |  | 1.00 | 0 (0, $+\infty$ )            | 0.95            |
|               | OR Model 2 | 1.00 | $+\infty (0, +\infty)$       | 0.15            |  | 1.00 | 0 (0, $+\infty$ )            | 0.91            |
| Max $\tau_6$  | OR Model 1 | 1.00 | 0 (0, $+\infty$ )            | 0.12            |  | 1.00 | 0 (0, 0)                     | <b>&lt;0.05</b> |

|               |            |      |                 |       |  |      |                |       |
|---------------|------------|------|-----------------|-------|--|------|----------------|-------|
|               | OR Model 2 | 1.00 | 0 (0, +∞)       | 0.13  |  | 1.00 | 0 (0, +∞)      | 0.21  |
| Mean $\tau_7$ | OR Model 1 | 1.00 | 0 (0, +∞)       | 0.93  |  | 1.00 | 0 (0, +∞)      | 0.06  |
|               | OR Model 2 | 1.00 | +∞ (0, +∞)      | 0.97  |  | 1.00 | +∞ (0, +∞)     | 0.58  |
| Std $\tau_7$  | OR Model 1 | 1.00 | 0 (0, +∞)       | 0.31  |  | 1.00 | 0 (0, +∞)      | 0.54  |
|               | OR Model 2 | 1.00 | 0 (0, +∞)       | 0.41  |  | 1.00 | 0 (0, +∞)      | 0.67  |
| Med $\tau_7$  | OR Model 1 | 1.00 | +∞ (+∞, +∞)     | <0.05 |  | 1.00 | +∞ (0, +∞)     | 0.18  |
|               | OR Model 2 | 1.00 | +∞ (+∞, +∞)     | <0.05 |  | 1.00 | +∞ (0, +∞)     | 0.80  |
| Min $\tau_7$  | OR Model 1 | 1.00 | 0 (0, +∞)       | 0.49  |  | 1.00 | 0 (0, +∞)      | 0.57  |
|               | OR Model 2 | 1.00 | 0 (0, +∞)       | 0.76  |  | 1.00 | 0 (0, +∞)      | 0.51  |
| Max $\tau_7$  | OR Model 1 | 1.00 | +∞ (0, +∞)      | 0.71  |  | 1.00 | +∞ (0, +∞)     | 0.09  |
|               | OR Model 2 | 1.00 | 0 (0, +∞)       | 0.94  |  | 1.00 | +∞ (0, +∞)     | 0.78  |
| Mean $\tau_8$ | OR Model 1 | 1.00 | +∞ (0, +∞)      | 0.15  |  | 1.00 | +∞ (0, +∞)     | 0.14  |
|               | OR Model 2 | 1.00 | +∞ (0, +∞)      | 0.19  |  | 1.00 | 0 (0, +∞)      | 0.55  |
| Std $\tau_8$  | OR Model 1 | 1.00 | 0 (0, +∞)       | 0.35  |  | 1.00 | 0 (0, +∞)      | 0.05  |
|               | OR Model 2 | 1.00 | 0 (0, +∞)       | 0.26  |  | 1.00 | +∞ (0, +∞)     | 0.97  |
| Med $\tau_8$  | OR Model 1 | 1.00 | 0 (0, +∞)       | 0.58  |  | 1.00 | 0 (0, +∞)      | 0.07  |
|               | OR Model 2 | 1.00 | 0 (0, +∞)       | 0.36  |  | 1.00 | 0 (0, +∞)      | 0.67  |
| Min $\tau_8$  | OR Model 1 | 1.00 | 0 (0, +∞)       | 0.27  |  | 1.00 | 0 (0, +∞)      | 0.70  |
|               | OR Model 2 | 1.00 | 0 (0, +∞)       | 0.14  |  | 1.00 | +∞ (0, +∞)     | 0.94  |
| Max $\tau_8$  | OR Model 1 | 1.00 | +∞ (0, +∞)      | 0.30  |  | 1.00 | +∞ (0, +∞)     | 0.05  |
|               | OR Model 2 | 1.00 | +∞ (0, +∞)      | 0.18  |  | 1.00 | +∞ (0, +∞)     | 0.77  |
| Mean $\tau_9$ | OR Model 1 | 1.00 | 0 (0, +∞)       | 0.69  |  | 1.00 | 0 (0, 0)       | <0.05 |
|               | OR Model 2 | 1.00 | 0 (0, +∞)       | 0.17  |  | 1.00 | 0 (0, +∞)      | 0.14  |
| Std $\tau_9$  | OR Model 1 | 1.00 | +∞ (0, +∞)      | 0.15  |  | 1.00 | +∞ (+∞, +∞)    | <0.05 |
|               | OR Model 2 | 1.00 | +∞ (31.392, +∞) | <0.05 |  | 1.00 | +∞ (+∞, +∞)    | <0.05 |
| Med $\tau_9$  | OR Model 1 | 1.00 | 0 (0, 54.828)   | 0.16  |  | 1.00 | +∞ (0.002, +∞) | 0.08  |
|               | OR Model 2 | 1.00 | 0 (0, +∞)       | 0.19  |  | 1.00 | +∞ (0, +∞)     | 0.38  |

|                  |            |      |                              |                 |  |      |                              |                 |
|------------------|------------|------|------------------------------|-----------------|--|------|------------------------------|-----------------|
| Min $\tau_9$     | OR Model 1 | 1.00 | $+\infty (0.322, +\infty)$   | 0.11            |  | 1.00 | $+\infty (0.002, +\infty)$   | 0.15            |
|                  | OR Model 2 | 1.00 | $+\infty (0.255, +\infty)$   | 0.10            |  | 1.00 | $+\infty (0, +\infty)$       | 0.60            |
| Max $\tau_9$     | OR Model 1 | 1.00 | $+\infty (0, +\infty)$       | 0.50            |  | 1.00 | 0 (0, $+\infty$ )            | 0.07            |
|                  | OR Model 2 | 1.00 | 5.371(0, $+\infty$ )         | 0.85            |  | 1.00 | 0 (0, $+\infty$ )            | 0.18            |
| Mean $\tau_{10}$ | OR Model 1 | 1.00 | 0 (0, $+\infty$ )            | 0.11            |  | 1.00 | 0 (0, $+\infty$ )            | 0.18            |
|                  | OR Model 2 | 1.00 | 0 (0, $+\infty$ )            | 0.09            |  | 1.00 | 0 (0, $+\infty$ )            | 0.70            |
| Std $\tau_{10}$  | OR Model 1 | 1.00 | $+\infty (0, +\infty)$       | 0.11            |  | 1.00 | 0 (0, $+\infty$ )            | 0.37            |
|                  | OR Model 2 | 1.00 | $+\infty (0, +\infty)$       | 0.12            |  | 1.00 | 0 (0, $+\infty$ )            | 0.95            |
| Med $\tau_{10}$  | OR Model 1 | 1.00 | $+\infty (12.0915, +\infty)$ | <b>&lt;0.05</b> |  | 1.00 | $+\infty (1.878, +\infty)$   | <b>&lt;0.05</b> |
|                  | OR Model 2 | 1.00 | $+\infty (+\infty, +\infty)$ | <b>&lt;0.05</b> |  | 1.00 | $+\infty (0, +\infty)$       | 0.14            |
| Min $\tau_{10}$  | OR Model 1 | 1.00 | $+\infty (1.302, +\infty)$   | <b>&lt;0.05</b> |  | 1.00 | $+\infty (0, +\infty)$       | 0.19            |
|                  | OR Model 2 | 1.00 | $+\infty (1.232, +\infty)$   | <b>&lt;0.05</b> |  | 1.00 | 0 (0, $+\infty$ )            | 0.95            |
| Max $\tau_{10}$  | OR Model 1 | 1.00 | 0 (0, 0.004)                 | <b>&lt;0.05</b> |  | 1.00 | 0 (0, $+\infty$ )            | 0.70            |
|                  | OR Model 2 | 1.00 | 0 (0, 0.012)                 | <b>&lt;0.05</b> |  | 1.00 | 0 (0, $+\infty$ )            | 0.87            |
| Mean $\tau_{11}$ | OR Model 1 | 1.00 | $+\infty (0, +\infty)$       | 0.35            |  | 1.00 | $+\infty (+\infty, +\infty)$ | <b>&lt;0.05</b> |
|                  | OR Model 2 | 1.00 | $+\infty (0, +\infty)$       | 0.08            |  | 1.00 | $+\infty (0, +\infty)$       | 0.29            |
| Std $\tau_{11}$  | OR Model 1 | 1.00 | 0 (0, $+\infty$ )            | 0.81            |  | 1.00 | 0 (0, $+\infty$ )            | 0.82            |
|                  | OR Model 2 | 1.00 | 0 (0, $+\infty$ )            | 0.68            |  | 1.00 | 0 (0, $+\infty$ )            | 0.76            |
| Med $\tau_{11}$  | OR Model 1 | 1.00 | 0 (0, $+\infty$ )            | 0.43            |  | 1.00 | 0 (0, $+\infty$ )            | 0.06            |
|                  | OR Model 2 | 1.00 | 0 (0, $+\infty$ )            | 0.68            |  | 1.00 | 0 (0, $+\infty$ )            | 0.90            |
| Min $\tau_{11}$  | OR Model 1 | 1.00 | 0 (0, $+\infty$ )            | 0.75            |  | 1.00 | 0 (0, 0)                     | <b>&lt;0.05</b> |
|                  | OR Model 2 | 1.00 | $+\infty (0, +\infty)$       | 0.79            |  | 1.00 | 0 (0, $+\infty$ )            | 0.72            |
| Max $\tau_{11}$  | OR Model 1 | 1.00 | 0 (0, 0)                     | <b>&lt;0.05</b> |  | 1.00 | 0 (0, $+\infty$ )            | 0.06            |
|                  | OR Model 2 | 1.00 | 0 (0, 0)                     | <b>&lt;0.05</b> |  | 1.00 | 0 (0, $+\infty$ )            | 0.83            |
| Mean $\tau_{12}$ | OR Model 1 | 1.00 | 0 (0, 0)                     | <b>&lt;0.05</b> |  | 1.00 | 0 (0, $+\infty$ )            | 0.30            |
|                  | OR Model 2 | 1.00 | 0 (0, 0)                     | <b>&lt;0.05</b> |  | 1.00 | $+\infty (0, +\infty)$       | 0.93            |
| Std $\tau_{12}$  | OR Model 1 | 1.00 | $+\infty (+\infty, +\infty)$ | <b>&lt;0.05</b> |  | 1.00 | $+\infty (0, +\infty)$       | 0.17            |

|                  |            |      |                              |                 |  |      |                            |                 |
|------------------|------------|------|------------------------------|-----------------|--|------|----------------------------|-----------------|
|                  | OR Model 2 | 1.00 | $+\infty (+\infty, +\infty)$ | <b>&lt;0.05</b> |  | 1.00 | 0 (0, $+\infty$ )          | 0.94            |
| Med $\tau_{12}$  | OR Model 1 | 1.00 | $+\infty (+\infty, +\infty)$ | <b>&lt;0.05</b> |  | 1.00 | $+\infty (0, +\infty)$     | 0.06            |
|                  | OR Model 2 | 1.00 | $+\infty (+\infty, +\infty)$ | <b>&lt;0.05</b> |  | 1.00 | $+\infty (0, +\infty)$     | 0.47            |
| Min $\tau_{12}$  | OR Model 1 | 1.00 | 0 (0, 0)                     | <b>&lt;0.05</b> |  | 1.00 | 0 (0, $+\infty$ )          | 0.18            |
|                  | OR Model 2 | 1.00 | 0 (0, 0)                     | <b>&lt;0.05</b> |  | 1.00 | 0 (0, $+\infty$ )          | 0.93            |
| Max $\tau_{12}$  | OR Model 1 | 1.00 | 0 (0, $+\infty$ )            | 0.09            |  | 1.00 | 0 (0, $+\infty$ )          | 0.24            |
|                  | OR Model 2 | 1.00 | 0 (0, $+\infty$ )            | 0.10            |  | 1.00 | $+\infty (0, +\infty)$     | 0.85            |
| Mean $\tau_{13}$ | OR Model 1 | 1.00 | 0 (0, $+\infty$ )            | 0.26            |  | 1.00 | 0 (0, 0)                   | <b>&lt;0.05</b> |
|                  | OR Model 2 | 1.00 | 0 (0, $+\infty$ )            | 0.06            |  | 1.00 | 0 (0, $+\infty$ )          | 0.27            |
| Std $\tau_{13}$  | OR Model 1 | 1.00 | $+\infty (0, +\infty)$       | 0.85            |  | 1.00 | 0 (0, $+\infty$ )          | 0.12            |
|                  | OR Model 2 | 1.00 | $+\infty (0, +\infty)$       | 0.70            |  | 1.00 | 0 (0, $+\infty$ )          | 0.91            |
| Med $\tau_{13}$  | OR Model 1 | 1.00 | $+\infty (0.011, +\infty)$   | 0.08            |  | 1.00 | $+\infty (0, +\infty)$     | 0.11            |
|                  | OR Model 2 | 1.00 | $+\infty (0.001, +\infty)$   | 0.09            |  | 1.00 | $+\infty (0, +\infty)$     | 0.84            |
| Min $\tau_{13}$  | OR Model 1 | 1.00 | $+\infty (0, +\infty)$       | 0.80            |  | 1.00 | $+\infty (0.623, +\infty)$ | 0.05            |
|                  | OR Model 2 | 1.00 | 0 (0, $+\infty$ )            | 0.73            |  | 1.00 | $+\infty (0, +\infty)$     | 0.74            |
| Max $\tau_{13}$  | OR Model 1 | 1.00 | $+\infty (+\infty, +\infty)$ | <b>&lt;0.05</b> |  | 1.00 | $+\infty (0, +\infty)$     | <b>0.05</b>     |
|                  | OR Model 2 | 1.00 | $+\infty (+\infty, +\infty)$ | <b>&lt;0.05</b> |  | 1.00 | $+\infty (0, +\infty)$     | 0.80            |
| Mean $\tau_{14}$ | OR Model 1 | 1.00 | $+\infty (+\infty, +\infty)$ | <b>&lt;0.05</b> |  | 1.00 | $+\infty (0, +\infty)$     | 0.32            |
|                  | OR Model 2 | 1.00 | $+\infty (+\infty, +\infty)$ | <b>&lt;0.05</b> |  | 1.00 | 0 (0, $+\infty$ )          | 0.93            |
| Std $\tau_{14}$  | OR Model 1 | 1.00 | 0 (0, 0)                     | <b>&lt;0.05</b> |  | 1.00 | 0 (0, $+\infty$ )          | 0.25            |
|                  | OR Model 2 | 1.00 | 0 (0, 0)                     | <b>&lt;0.05</b> |  | 1.00 | $+\infty (0, +\infty)$     | 0.90            |
| Med $\tau_{14}$  | OR Model 1 | 1.00 | 0 (0, 0)                     | <b>&lt;0.05</b> |  | 1.00 | 0 (0, $+\infty$ )          | 0.06            |
|                  | OR Model 2 | 1.00 | 0 (0, 0)                     | <b>&lt;0.05</b> |  | 1.00 | 0 (0, $+\infty$ )          | 0.51            |
| Min $\tau_{14}$  | OR Model 1 | 1.00 | $+\infty (+\infty, +\infty)$ | <b>&lt;0.05</b> |  | 1.00 | $+\infty (0, +\infty)$     | 0.18            |
|                  | OR Model 2 | 1.00 | $+\infty (+\infty, +\infty)$ | <b>&lt;0.05</b> |  | 1.00 | $+\infty (0, +\infty)$     | 0.95            |
| Max $\tau_{14}$  | OR Model 1 | 1.00 | $+\infty (0, +\infty)$       | 0.29            |  | 1.00 | $+\infty (0, +\infty)$     | 0.52            |
|                  | OR Model 2 | 1.00 | $+\infty (0, +\infty)$       | 0.36            |  | 1.00 | 0 (0, $+\infty$ )          | 0.79            |



|                       |            |      |                               |                 |  |      |                               |      |
|-----------------------|------------|------|-------------------------------|-----------------|--|------|-------------------------------|------|
| Box dimension         | OR Model 1 | 1.00 | $+\infty$ (3.423, $+\infty$ ) | <b>&lt;0.05</b> |  | 1.00 | $+\infty$ (0.004, $+\infty$ ) | 0.13 |
|                       | OR Model 2 | 1.00 | $+\infty$ (2.390, $+\infty$ ) | <b>&lt;0.05</b> |  | 1.00 | $+\infty$ (0, $+\infty$ )     | 0.55 |
| Information dimension | OR Model 1 | 1.00 | $+\infty$ (3.224, $+\infty$ ) | <b>&lt;0.05</b> |  | 1.00 | $+\infty$ (0, $+\infty$ )     | 0.29 |
|                       | OR Model 2 | 1.00 | $+\infty$ (2.093, $+\infty$ ) | <b>&lt;0.05</b> |  | 1.00 | $+\infty$ (0, $+\infty$ )     | 0.59 |
| Correlation dimension | OR Model 1 | 1.00 | $+\infty$ (3.736, $+\infty$ ) | <b>&lt;0.05</b> |  | 1.00 | $+\infty$ (0, $+\infty$ )     | 0.14 |
|                       | OR Model 2 | 1.00 | $+\infty$ (2.410, $+\infty$ ) | <b>&lt;0.05</b> |  | 1.00 | $+\infty$ (0, $+\infty$ )     | 0.53 |
